# Supplementary material
Source: PubMed Central journal article supplement (PMC6124498)
Supplement: NIHMS980362-supplement-Supplementary_Table_6.pdf [file NIHMS980362-supplement-Supplementary_Table_6.pdf]

**Table S6. Overlap analysis between eQTLs in AD and regions of H4K16ac changes (three classes of peaks).** The numbers of AD eQTLs from the Zou et al. studies [43] that overlap with regions of H4K16ac changes (peak class) are shown for each intersecting row (the three peak classes) and column (the three sets of eQTLs identified in Zou et al.). The Zou et al. dataset contains significant eQTLs from the AD cases, eQTLs from the non-AD cases and eQTLs from the combined set of AD and non-AD cases in the temporal cortex.

| H4K16ac peak class | Zou et al.                 |                                |                               |
|--------------------|----------------------------|--------------------------------|-------------------------------|
|                    | # temporal cortex AD eQTLs | # temporal cortex non-AD eQTLs | # temporal cortex comb. eQTLs |
| Age-regulated      | 143                        | 105                            | 232                           |
| Age-dysregulated   | 231                        | 171                            | 431                           |
| Disease-specific   | 220                        | 178                            | 427                           |
